# Supplementary material for: Engineering of a microfluidic cell culture platform embedded with nanoscale features
Source: Royal Society of Chemistry journal article supplement (doi:10.1039/c0lc00736f), 2011-01-01
Supplement: c0lc00736f.pdf [file c0lc00736f.pdf]

## **Engineering of a microfluidic cell culture platform embedded with nanoscale features**

**Yong Yang,<sup>a</sup> Karina Kulangara,<sup>a</sup> Jaren Sia,<sup>a</sup> Lu Wang<sup>b</sup> and Kam W. Leong<sup>\*a</sup>**

<sup>a</sup> *Department of Biomedical Engineering, Duke University, Durham, NC 27708; E-mail: kam.leong@duke.edu*

<sup>b</sup> *Duke Human Vaccine Institute, Duke University, Durham, NC 27710*

**Supplementary Movie S1** hMSCs migrated preferentially along the nanogratings which were perpendicular to the direction of flow at a rate of 267  $\mu\text{m/s}$  (shear stress: 0.03  $\text{N/m}^2$ ). The cells were allowed to adhere to the surface for 24 hrs before the flow was initiated. The playing speed of the video is 3000 times of real time.

**Supplementary Movie S2** hMSCs migrated randomly on flat surface in a microfluidic platform. The cells were allowed to adhere to the surface for 24 hrs and a flow of 267  $\mu\text{m/s}$  (shear stress: 0.03  $\text{N/m}^2$ ) was initiated. The playing speed of the video is 3000 times of real time
